# Supplementary material for: The microRNAs let-7 and miR-278 regulate insect metamorphosis and oogenesis by targeting the juvenile hormone early-response gene Krüppel-homolog 1
Source: Oxford University Press journal article supplement (doi:10.1242/dev.170670), 2018-11-23
Supplement: dev170670supp.pdf [file dev170670supp.pdf]

## Supplementary information

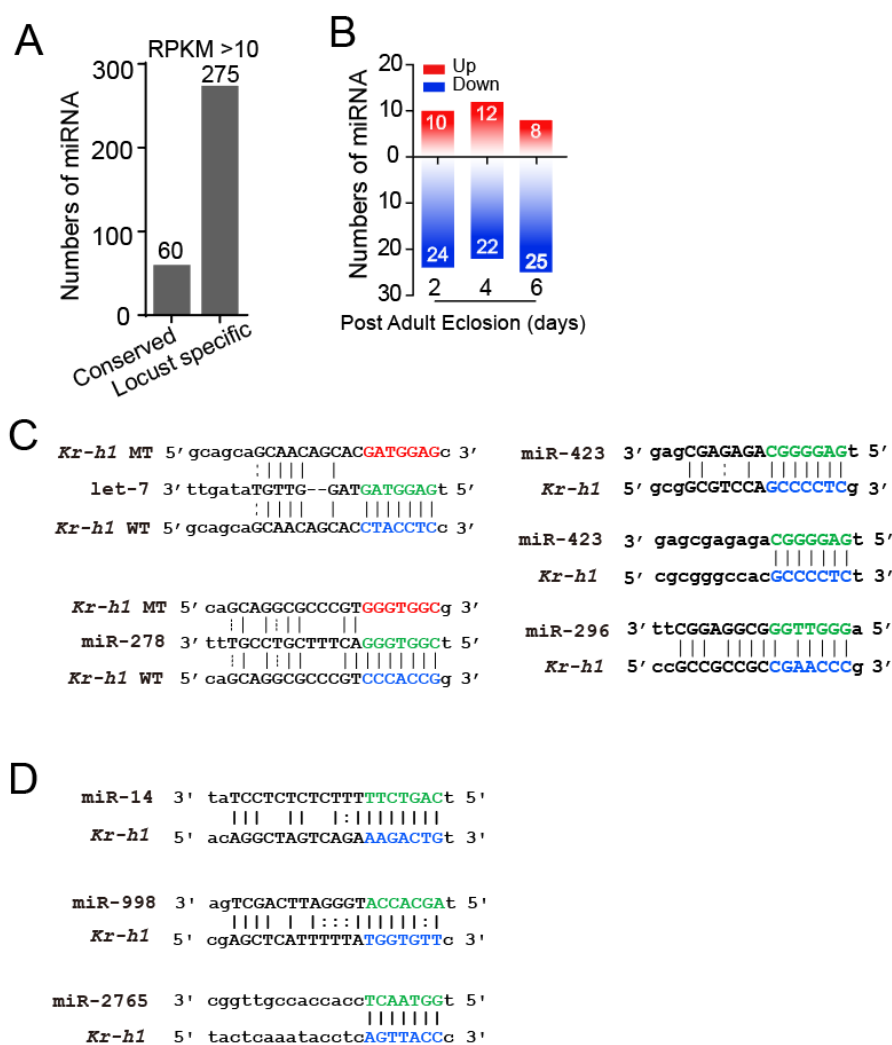

**Fig. S1. miRNA identification and binding site prediction for *Kr-h1*.** (A) Numbers of conserved miRNA and locust specific miRNA with RPKM values > 10. (B) The number of upregulated and downregulated miRNAs in the fat body of adult females at 2, 4 and 6 days post adult eclosion compared to that on the day of adult eclosion. (C, D) Sequence alignment of miRNAs with their predicted binding sites in the CDS (C) and 3'UTR (D) of *Kr-h1*. The binding sites (blue) in *Kr-h1* complementary to the seed region (green) of *let-7* and *miR-278* were site-mutated to their complementary bases (red) in the luciferase reporter assays.

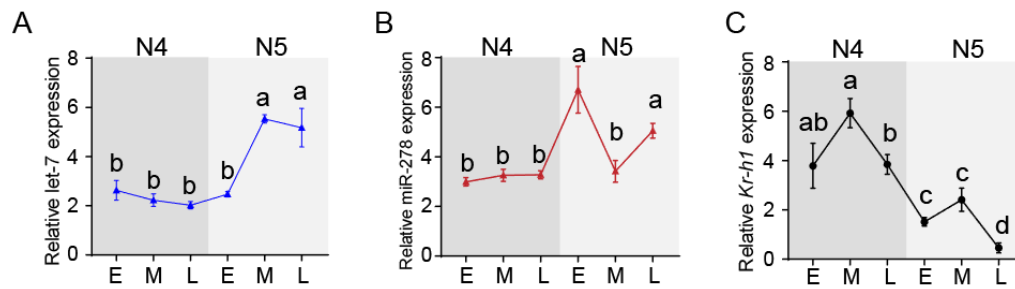

**Fig. S2. The temporal expression patterns of let-7, miR-278 and *Kr-h1* in late-instar locust nymphs.** qRT-PCR showing the relative levels of let-7 (A), miR-278 (B) and *Kr-h1* (C) expression in the whole body of penultimate 4<sup>th</sup> (N4) and final 5<sup>th</sup> (N5) instar nymphs. E, M, and L indicate the early (day 1), middle (day 2 for N4, and day 3 for N5), and late (day 4 for N4, and day 5 for N5) stages, respectively. The duration of 4<sup>th</sup> and 5<sup>th</sup> instar nymphs was about 4 days and 5 days, respectively under our rearing conditions. In each panel, the means labeled with different letters indicate significant difference at  $P < 0.05$ .  $n = 8$ .

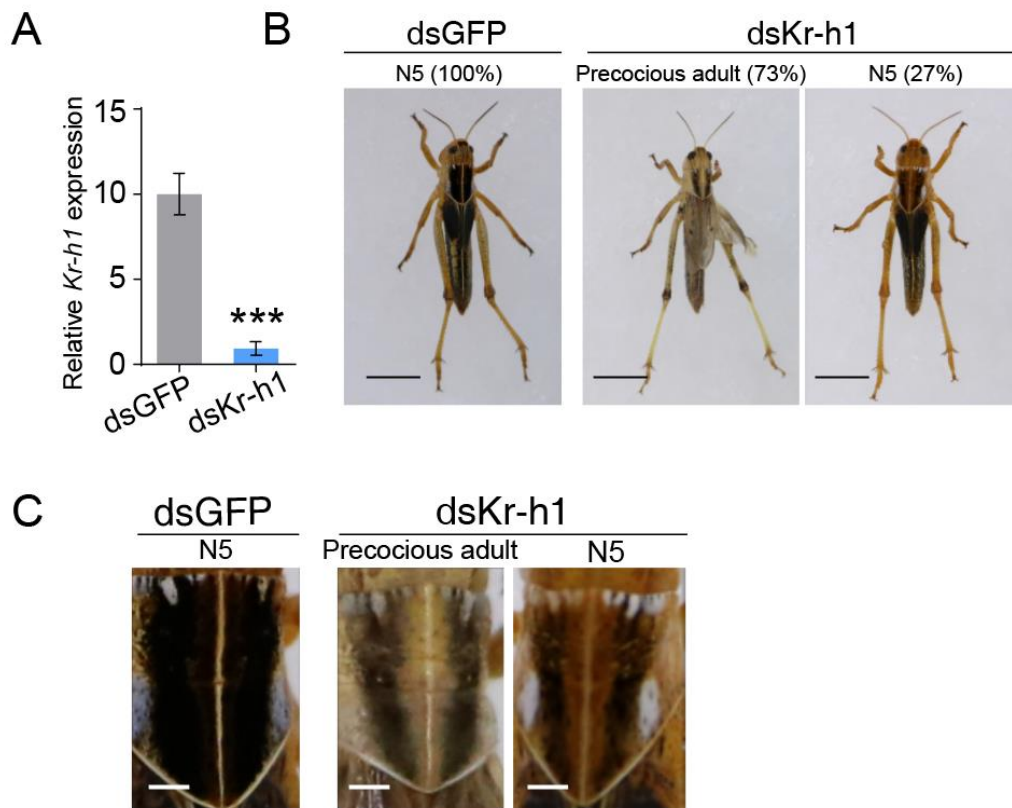

**Fig. S3. Effect of *Kr-h1* knockdown on locust metamorphosis.** (A) RNAi-mediated knockdown efficiency of *Kr-h1* in the whole body of final 5<sup>th</sup> instar nymphs previously subjected to dsKr-h1 treatment at the penultimate 4<sup>th</sup> nymphal instar. \*\*\*,  $P < 0.001$  compared to the dsGFP control.  $n = 7-8$ . (B) Representative phenotypes and percentage of precocious metamorphosis at the final instar nymphs (N5) previously subjected to dsKr-h1 treatment at the penultimate 4<sup>th</sup> nymph instar (3 replicates with 7-8 locusts in each treatment). Scale bar, 1 cm. (C) Enlarged images of the pronotum shown in (B). Scale bar, 0.1 cm.

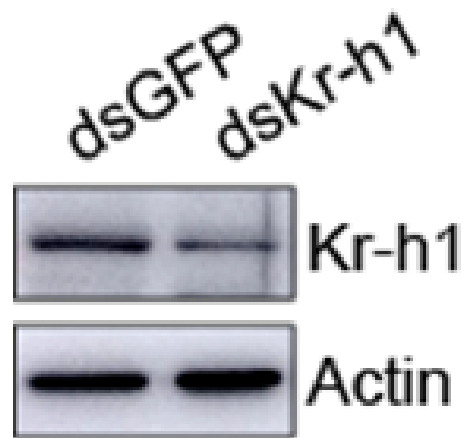

**Fig. S4. Specificity of the antiserum.** The antiserum specificity was verified by western blot using protein extracted from fat body of locusts treated with dsKr-h1 versus dsGFP.

**Table S1. Primers used in qRT-PCR, mutation and RNAi.**

| Primer Name            | Sequence (5' to 3')                           |
|------------------------|-----------------------------------------------|
| <b>qRT-PCR</b>         |                                               |
| qKr-h1-F               | ACTTCGTCTTCTGGAATGA                           |
| qKr-h1-R               | GGCAATCGGTATTACACTTAG                         |
| qlet-7-F               | GCTGAGGTAGTAGGTTGTATAGTT                      |
| qmiR-278-F             | GGTGGGACTTTTCGTCCGTTT                         |
| qU6                    | ACACTCCAGCTGGGTCAAATCGTGAAGCG                 |
| qVgA-F                 | CCCACAAGAAGCACAGAACG                          |
| qVgA-R                 | TTGGTCGCCATCAACAGAAG                          |
| qActin-F               | AATTACCATTGGTAACGAGCGATT                      |
| qActin-R               | TGCTTCCATACCCAGGAATGA                         |
| <b>site mutation</b>   |                                               |
| mut-let-7-F            | CCTCTGCTTGATGATGGAGTACTCGCAGCAGGCGCCCGTCCCAC  |
| mut-let-7-R            | CGAGTACTCCATCATCAAGCAGAGGTCGCGACCGCCCCCGGGCGT |
| mut-miR-278-F          | GCGCCCGTTGATGACGCGCACGCGGGCCACGCCCTCTCTCC     |
| mut-miR-278-R          | CGTGCGCGTCATCAACGGGCGCCTGCTGCGAGTACAGGTAGT    |
| <b>dsRNA synthesis</b> |                                               |
| dsKr-h1-F              | GTCAAGGAGAACCTGAGCGTGC                        |
| dsKr-h1-R              | TGCTGCTGCTCCGAGTGGCT                          |
| dsGFP-F                | CACAAGTTCAGCGTGTCCG                           |
| dsGFP-R                | GTTACCTTGATGCCGTTT                            |
